# Supplementary material
Source: PubMed Central journal article supplement (PMC7531607)

## Supplementary Data

**Supplementary Table 1.** Averaged Cumulative Daily Release of IGF-1 (ng) At Each Time Point

| Day    | IGF-1 release<br>(ng $\pm$ stdev), n=4 |
|--------|----------------------------------------|
| 0 (4h) | 1050.78 ( $\pm$ 130.76)                |
| 0 (8h) | 1173.46 ( $\pm$ 145.13)                |
| 1      | 1206.79 ( $\pm$ 151.75)                |
| 2      | 1221.29 ( $\pm$ 153.32)                |
| 4      | 1227.40 ( $\pm$ 153.21)                |
| 7      | 1234.14 ( $\pm$ 153.53)                |
| 14     | 1240.43 ( $\pm$ 153.37)                |
| 21     | 1243.84 ( $\pm$ 153.41)                |

**Supplementary Table 2.** Individual Daily Running Distance (kilometers)

| Day             | Running Distance    |                     |                           |                           |                           | Statistical difference between groups |
|-----------------|---------------------|---------------------|---------------------------|---------------------------|---------------------------|---------------------------------------|
|                 | Mouse A<br>Scaffold | Mouse B<br>Scaffold | Mouse C<br>Scaffold+IGF-1 | Mouse D<br>Scaffold+IGF-1 | Mouse E<br>Scaffold+IGF-1 |                                       |
| <b>Baseline</b> | 901.57              | 2527.01             | 772.94                    | 330.39                    | 244.55                    | n.s.                                  |
| 7               | 3177.35             | 2381.46             | 1985.07                   | 76.63                     | 74.30                     | n.s.                                  |
| 8               | 2931.89             | 8470.86             | 1731.44                   | 23.34                     | 53.68                     | n.s.                                  |
| 9               | 3060.65             | 8067.86             | 1437.36                   | 110.87                    | 44.76                     | n.s.                                  |
| 10              | 3769.02             | 9133.33             | 4282.50                   | 230.68                    | 86.75                     | n.s.                                  |
| 11              | 4690.56             | 10761.30            | 4080.22                   | 293.70                    | 115.53                    | n.s.                                  |
| 12              | 4715.85             | 14337.76            | 3803.64                   | 394.45                    | 99.20                     | n.s.                                  |
| 13              | 5025.49             | 14935.66            | 5077.62                   | 352.82                    | 102.70                    | n.s.                                  |
| 14              | 4645.83             | 14524.09            | 4014.48                   | 180.50                    | 56.02                     | n.s.                                  |
| 15              | 4571.14             | 15892.21            | 5614.83                   | 318.98                    | 107.36                    | n.s.                                  |
| 16              | 5304.79             | 14871.86            | 4982.31                   | 302.25                    | 166.88                    | n.s.                                  |
| 17              | 5661.51             | 17121.45            | 4795.59                   | 277.36                    | 220.95                    | n.s.                                  |
| 18              | 4534.57             | 17761.35            | 4349.41                   | 231.46                    | 204.61                    | n.s.                                  |
| 19              | 3235.31             | 18920.18            | 4162.30                   | 278.91                    | 154.82                    | n.s.                                  |
| 20              | 3150.51             | 19523.13            | 3826.98                   | 215.90                    | 222.90                    | n.s.                                  |

**Supplementary Figure 1.** Immunofluorescence staining of myofibers in a cross-section of the tibialis anterior muscle. (A) Mature non-regenerating myofibers that display peripherally located nuclei along the laminin myofiber edges and (B) actively regenerating myofibers containing centrally located nuclei.

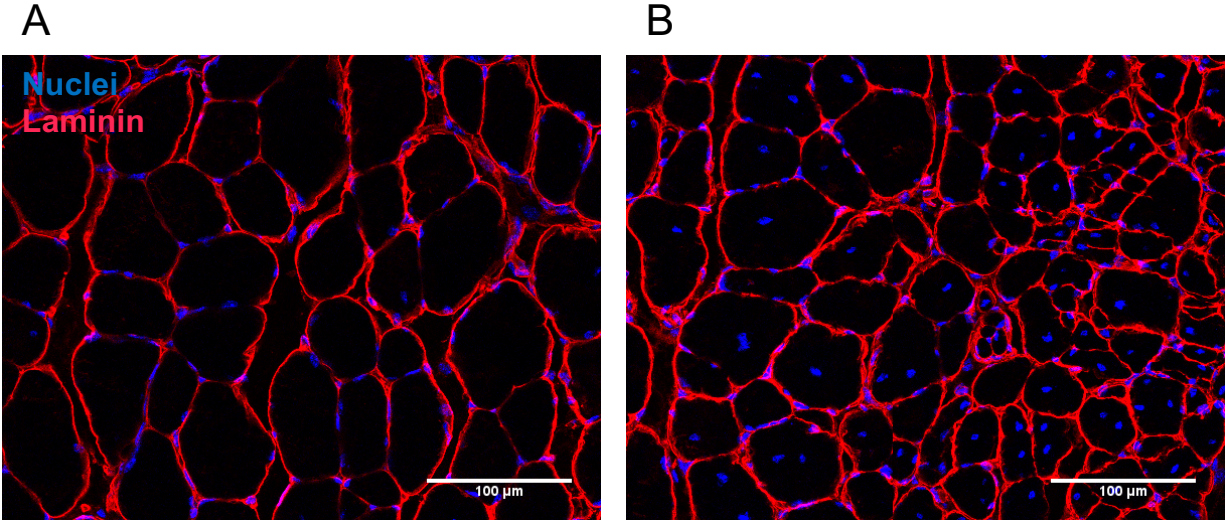

Supplement: NIHMS1625796-supplement-esi.pdf [file NIHMS1625796-supplement-esi.pdf]
